# Supplementary material for: Effects of ice cover on diversity and community assembly of benthic algae in a stream system of northern China
Source: Research Square preprint supplement (doi:10.21203/rs.3.rs-8292142/v1), 2025-12-15
Supplement: Supplementary file 1 [file 987a4b38e396a71d39c2ed3c.docx]

| **Categories** | **Traits** | **Codes** |
| --- | --- | --- |
| 1 .Cell size | <20um | Size1 |
| 20-200um | Size2 |
| >200um | Size3 |
| 2. Life form | Unicellular life form | Life1 |
| Filamentous life form | Life2 |
| Colonial life form | Life3 |
| 3. Attachment type | Weak attachment | Attach1 |
| Medium attachment | Attach2 |
| Strong attachment | Attach3 |
| 4. Growth form | Adherent or prostrate | Growth1 |
| Erect or with mucus stalk | Growth2 |
| Motile algae | Growth3 |
| Filamentous | Growth4 |
| Non-fixed structure algae | Growth5 |
| 5. Motility | Flagellated | Mot1 |
| Non-flagellated | Mot2 |
| 6. Mode of reproduction | Vegetative reproduction | rep1 |
| Asexual reproduction | rep2 |
| Sexual reproduction | rep3 |
| Vegetative or asexual reproduction | rep4 |
| Vegetative or sexual reproduction | rep5 |
| Asexual or sexual reproduction | rep6 |
| Vegetative, asexual, or sexual reproduction | rep7 |
