# Supplementary figures and images for: Effects of ice cover on diversity and community assembly of benthic algae in a stream system of northern China
Source: Research Square preprint supplement (doi:10.21203/rs.3.rs-8292142/v1), 2025-12-15

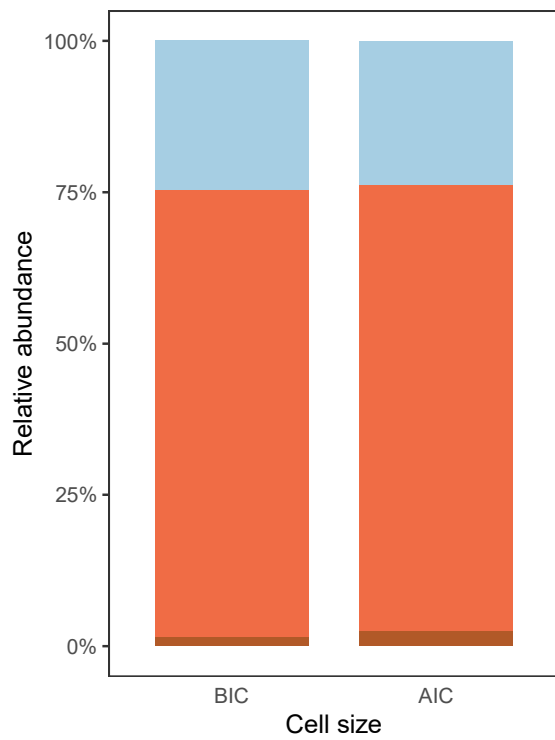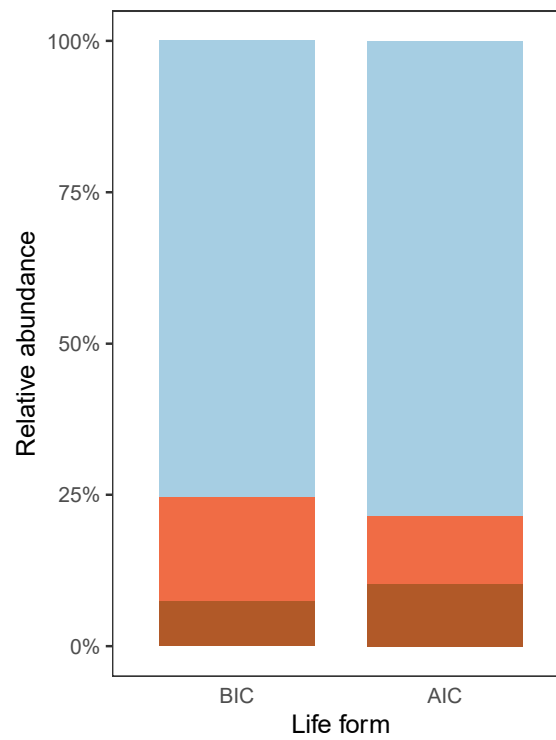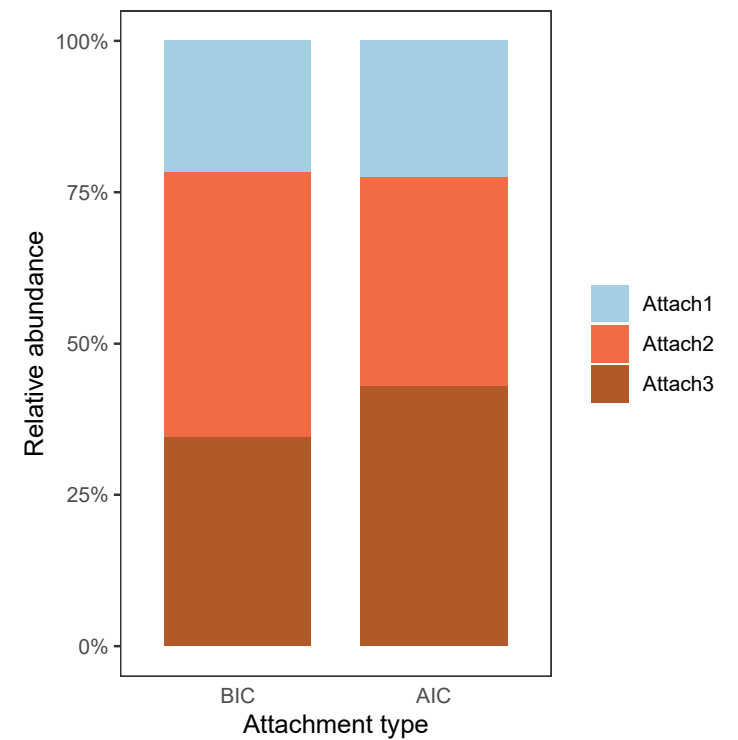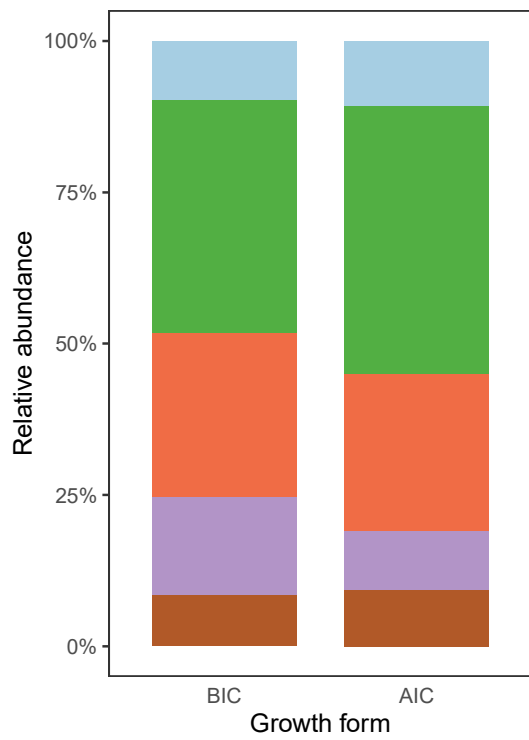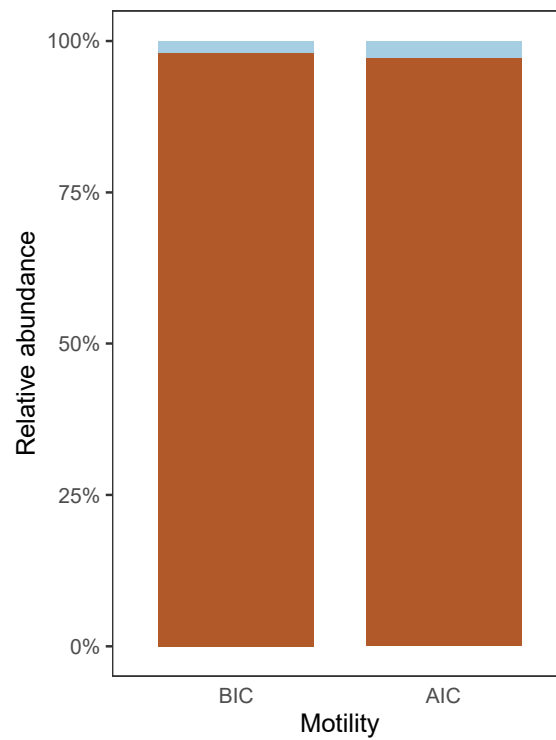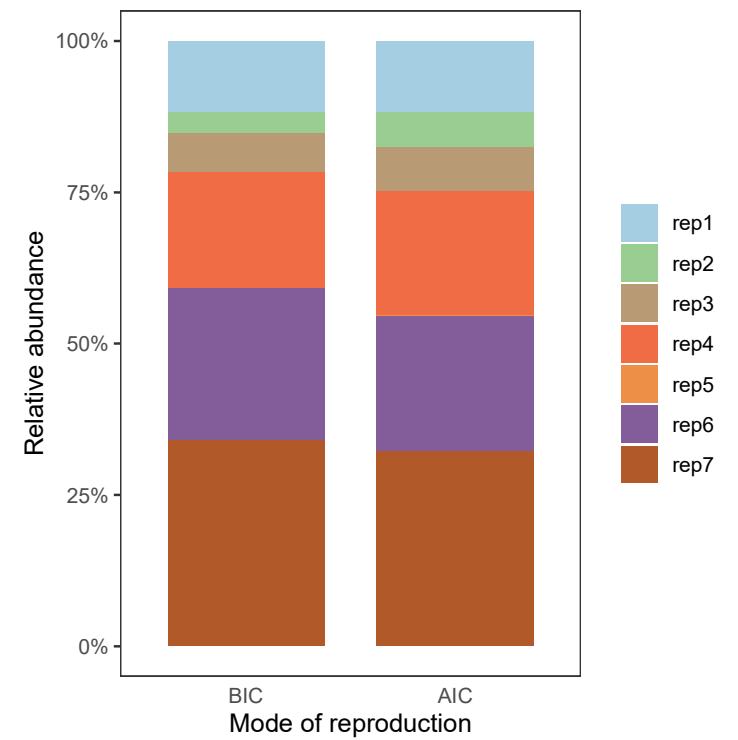

Supplement: Supplementary file 1 [file 36dce9340951e5ea95e9b6a7.pdf]
